# Supplementary material for: Stress-Coping Humoral Glycolipids Produced by Mice Given Controlled Bathing Treatments
Source: Neurosci J. 2019 Nov 3;2019:4972186. doi: 10.1155/2019/4972186 (PMC6875319; doi:10.1155/2019/4972186)
Supplement: Supplementary Material — Raw data of light absorbance indicating the glycolipid production. [file 4972186.f1.xlsx]

## Sheet: Sheet1
			Galbeta1-4GlcNAc
	plate1	plate2	plate3	plate4	plate5
B group	0.117	0.116	0.132	0.127	0.099
PH group	0.152	0.161	0.161	0.157	0.162
MB group	0.142	0.114	0.105	0.135	0.099
CM group	0.274	0.302	0.303	0.303	0.281
Blank(PS)	0.053	0.04	0.06	0.055	0.049
			GalNAcalpha1-3GalNAc
	plate1	plte2	plate3	plate4	plate5
B group	0.137	0.117	0.141	0.141	0.152
PH group	0.154	0.118	0.154	0.172	0.188
MB group	0.164	0.15	0.135	0.126	0.115
CM group	0.231	0.262	0.212	0.223	0.221
Blank(PS)	0.055	0.049	0.049	0.057	0.055
			Fucalpha1-3GlcNAc	2Glc
	plate1	plate2	plate3	plate4	plate5
B group	0.108	0.101	0.104	0.094	0.085
PH group	0.166	0.155	0.143	0.114	0.115
MB group	0.076	0.094	0.099	0.094	0.084
CM group	0.081	0.087	0.12	0.115	0.105
Blank(PS)	0.037	0.045	0.078	0.073	0.063
